# Supplementary material for: Linking compound weather extremes to Mediterranean cyclones, fronts and air-streams
Source: Copernicus journal article supplement (doi:10.5194/egusphere-2024-270), 2024-02-08
Supplement: Supplementary file 1 [file egusphere-2024-270-supplement.pdf]

# Linking extreme rain–wind and wave–wind compounds to Mediterranean cyclones

## Supplementary Material

Alice Portal<sup>1</sup>, Shira Raveh-Rubin<sup>2</sup>, Jennifer L Catto<sup>3</sup>, Yonatan Givon<sup>2</sup>, and Olivia Martius<sup>1</sup>

<sup>1</sup>Institute of Geography, Oeschger Centre for Climate Change Research, University of Bern, Bern, Switzerland

<sup>2</sup>Department of Earth and Planetary Sciences, Weizmann Institute of Science, Rehovot, Israel

<sup>3</sup>Department of Mathematics and Statistics, University of Exeter, Exeter, United Kingdom

**Correspondence:** Alice Portal (alice.portal@unibe.ch)

### List of material

- Threshold maps for extreme-event identification (Fig. SM1);
- Frequency maps of uni-variate extremes (Fig. SM2);
- Frequency maps of compound R<sup>∧</sup>W extremes, with uni-variate extremes defined based on the 95<sup>th</sup> percentile threshold (Fig. SM3) - instead of the 98<sup>th</sup> percentile threshold used to produce Fig. 4 in the main manuscript;
- 5   – Maps showing the ratio of compound over uni-variate extremes, i.e., the compounding ratio (Figs SM4, SM5);
- Frequency maps of the cyclone features used in the analyses of Figs 6, 8 in the main manuscript (Fig. SM6);
- Maps of the first, second and third dominant cyclone cluster in terms of absolute impact-area frequency (Fig. SM7).

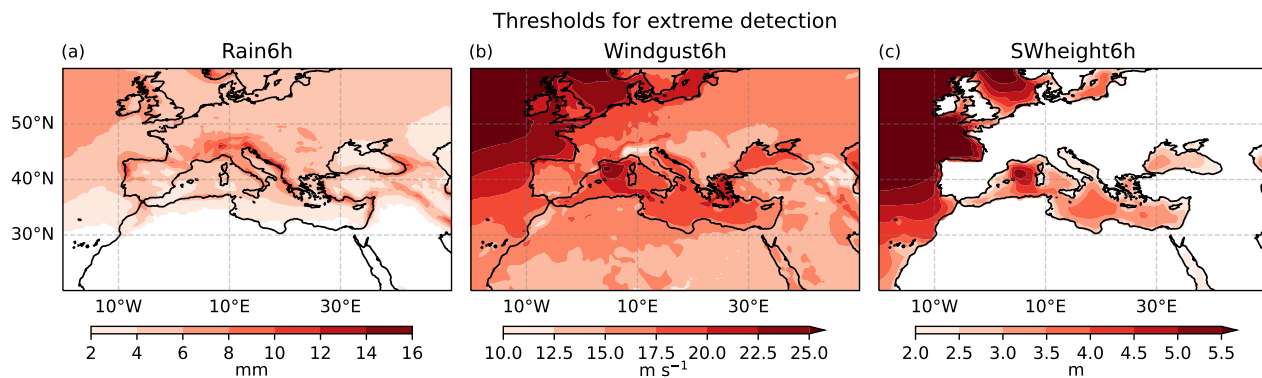

**Figure SM1.** Thresholds used for the identification of (a) Rain, (b) Windgust and (c) Swell-Wave height moderate extremes. These are defined as the 98th percentile of the variable distribution at each grid point, provided it exceeds a minimum value of 2 mm, 10  $\text{m s}^{-1}$  and 2 m, respectively

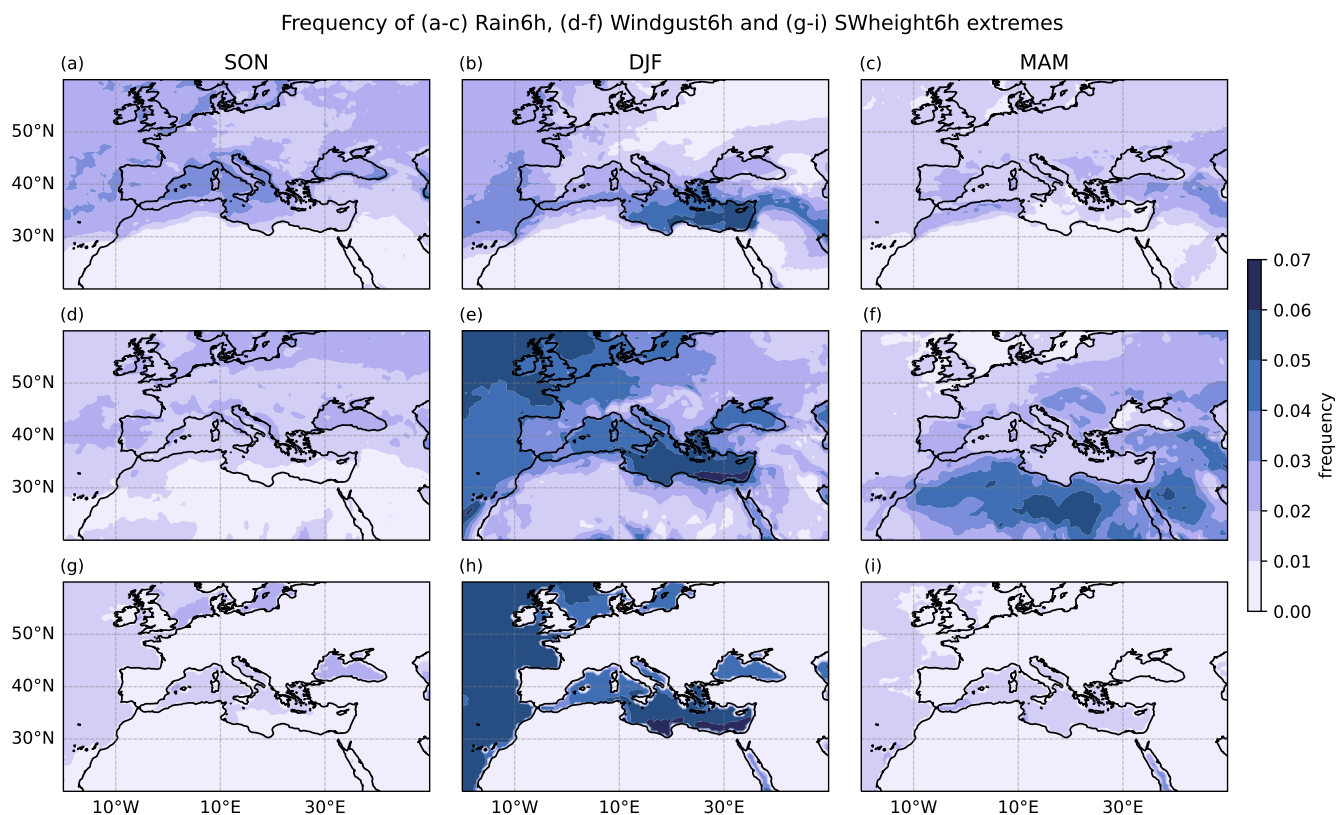

**Figure SM2.** Frequency of (a-c) Rain, (d-f) Windgust and (g-i) Swell-Wave height moderate extremes, computed as the number of extreme occurrences over the total number of 6-hourly time steps

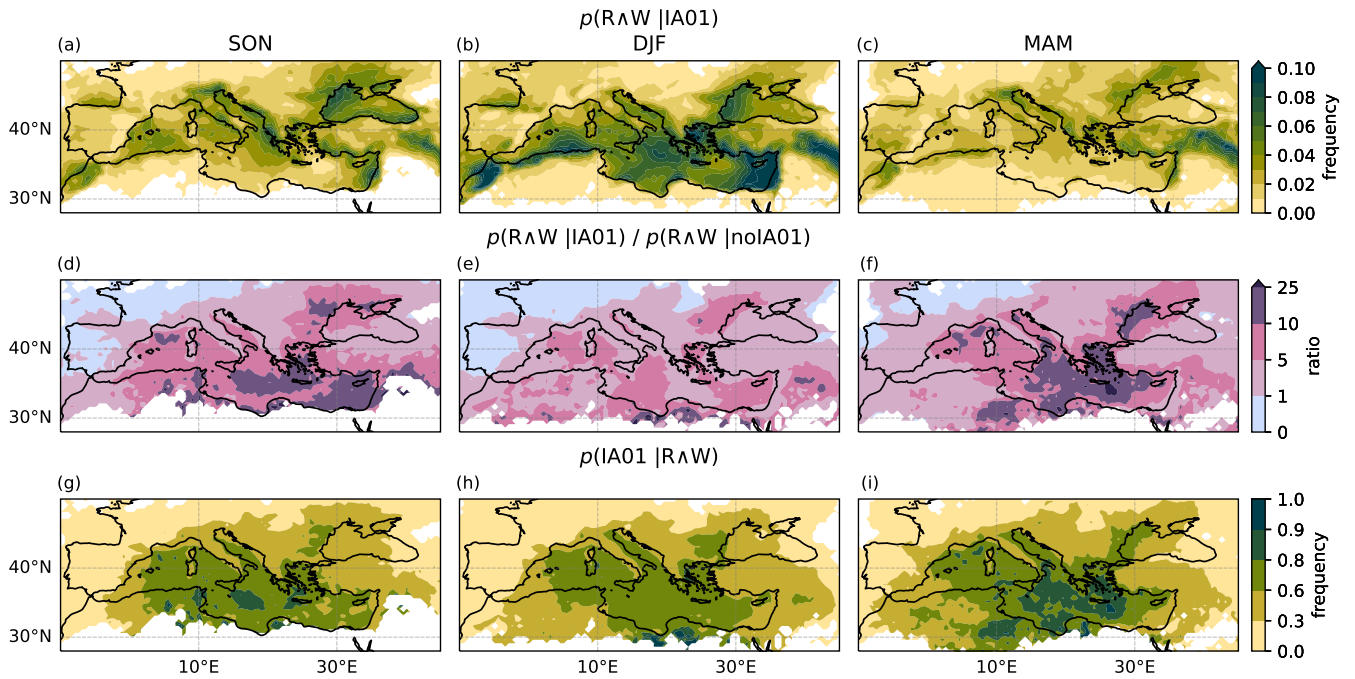

**Figure SM3.** As Fig. 4 in the main manuscript, but with extremes defined based on a local 95th percentile threshold. (a-c) The frequency of R^W compound conditional to the presence of a cyclone, (d-f) the ratio of R^W compound frequency during cyclone occurrence over the R^W compound frequency during times when cyclones do not occur, (g-i) the cyclone frequency conditional to the presence of R^W compounds. Seasonal results for autumn - SON, winter - DJF and spring - MAM are displayed on the left, centre and right panels, respectively. Grid points displaying less than four (R^W | IA01) events are masked out

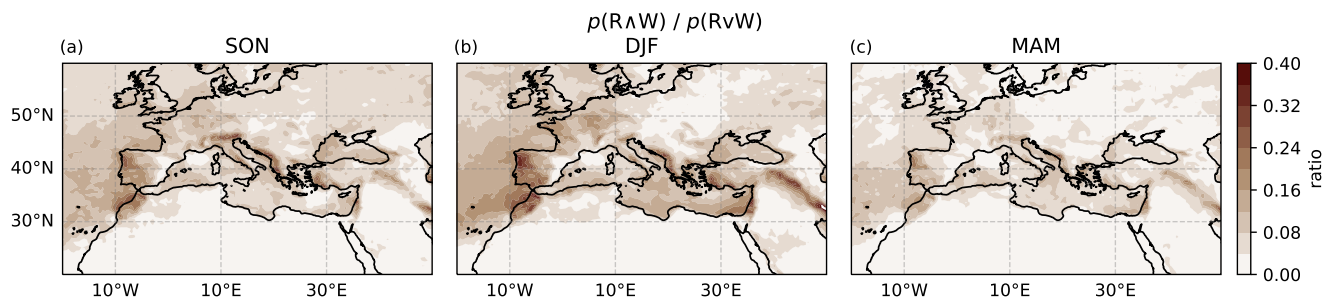

**Figure SM4.** Ratio of  $R \wedge W$  over  $R \vee W$  (shading), computed as the number of compound extreme occurrences over the number of uni-variate or compound extreme events

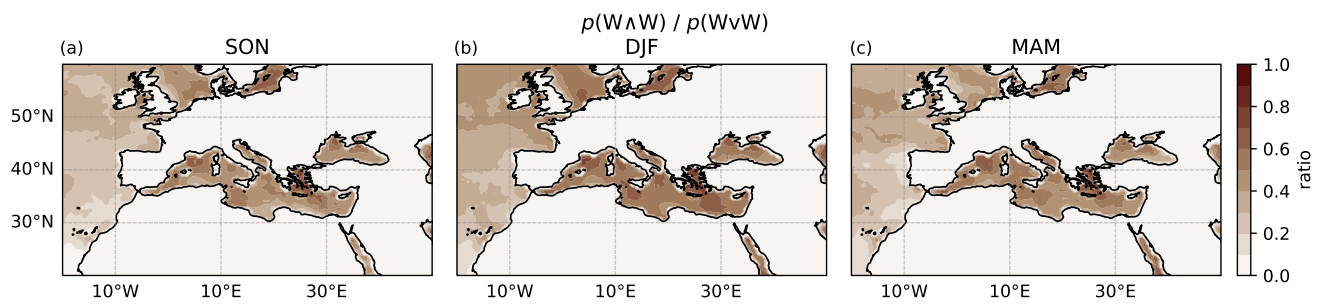

**Figure SM5.** As in Fig. SM4 for  $W \wedge W$  compound (note difference in colour scale)

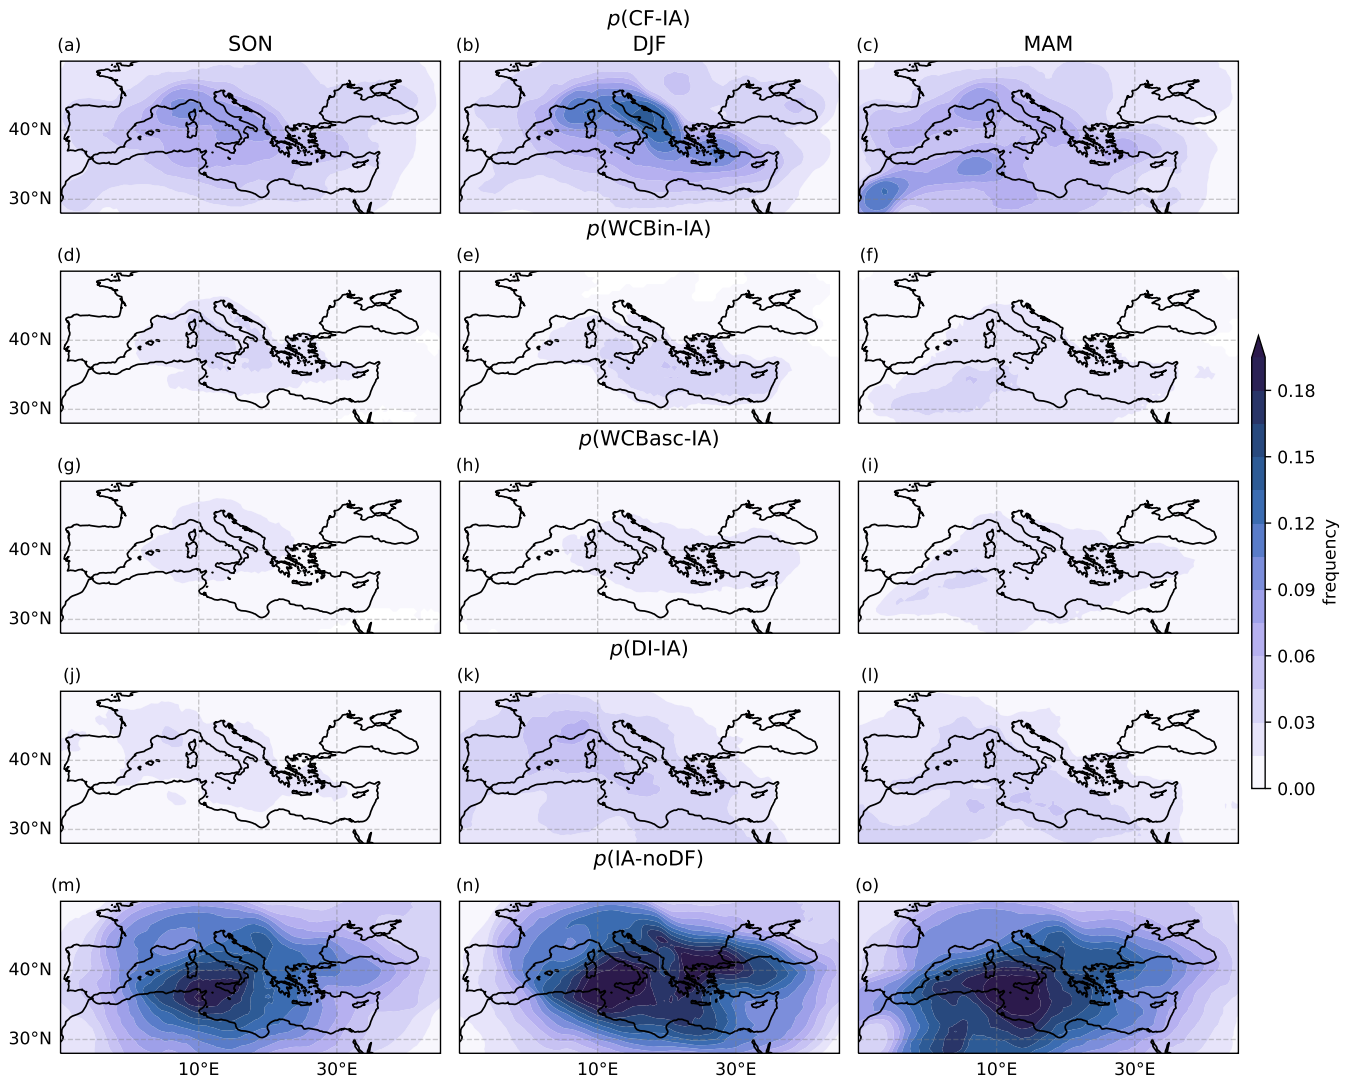

**Figure SM6.** Frequency of the cyclone features corresponding to cold fronts (a-c, CF-IA), regions of warm conveyor belt inflow (d-f, WCBin-IA) and ascent (g-i, WCBasc-IA), dry intrusions (j-l, DI-IA), and the 1000 km radius around the cyclone centre after removal of the aforementioned dynamical features' masks (m-o, IA-noDF), computed as the number of occurrences over the total number of 6-hourly time steps

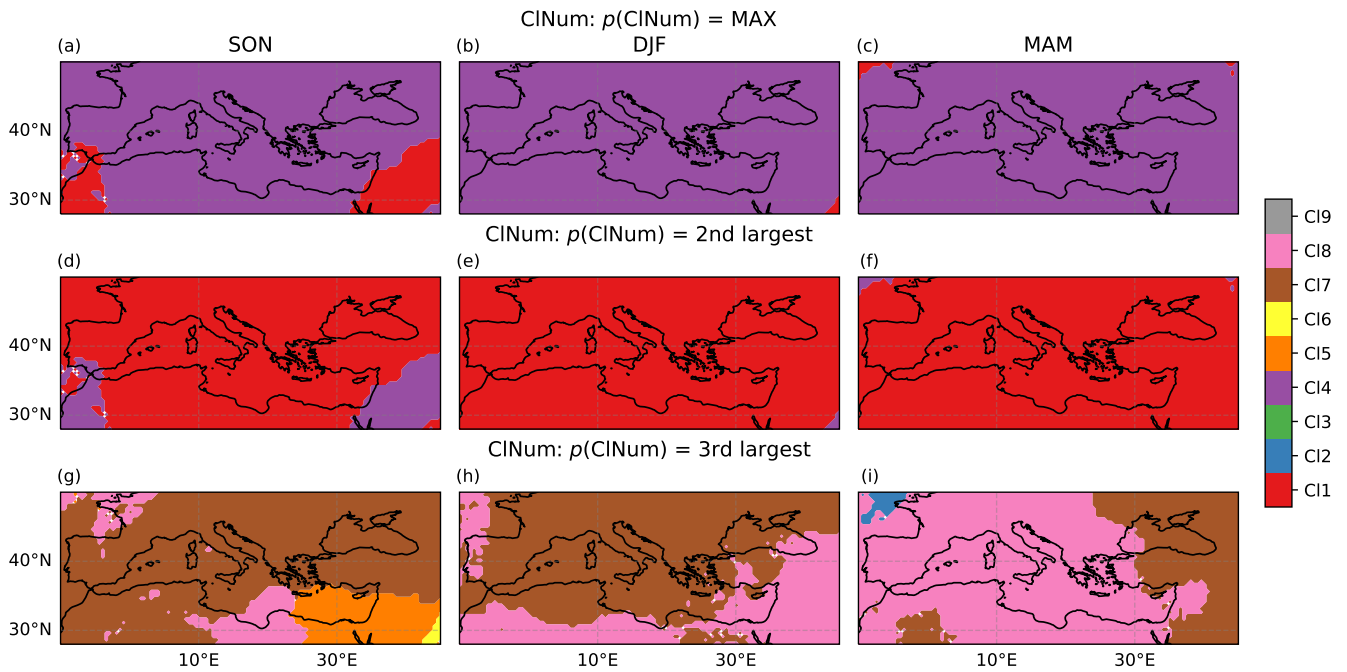

**Figure SM7.** The first, second and third cyclone cluster for frequency in (a,d,g) autumn - SON, (b,e,h) winter - DJF and (c,f,i) spring - MAM. Note that grid points simultaneously within the IA01 of multiple cyclones contribute to the frequencies of all the relevant clusters

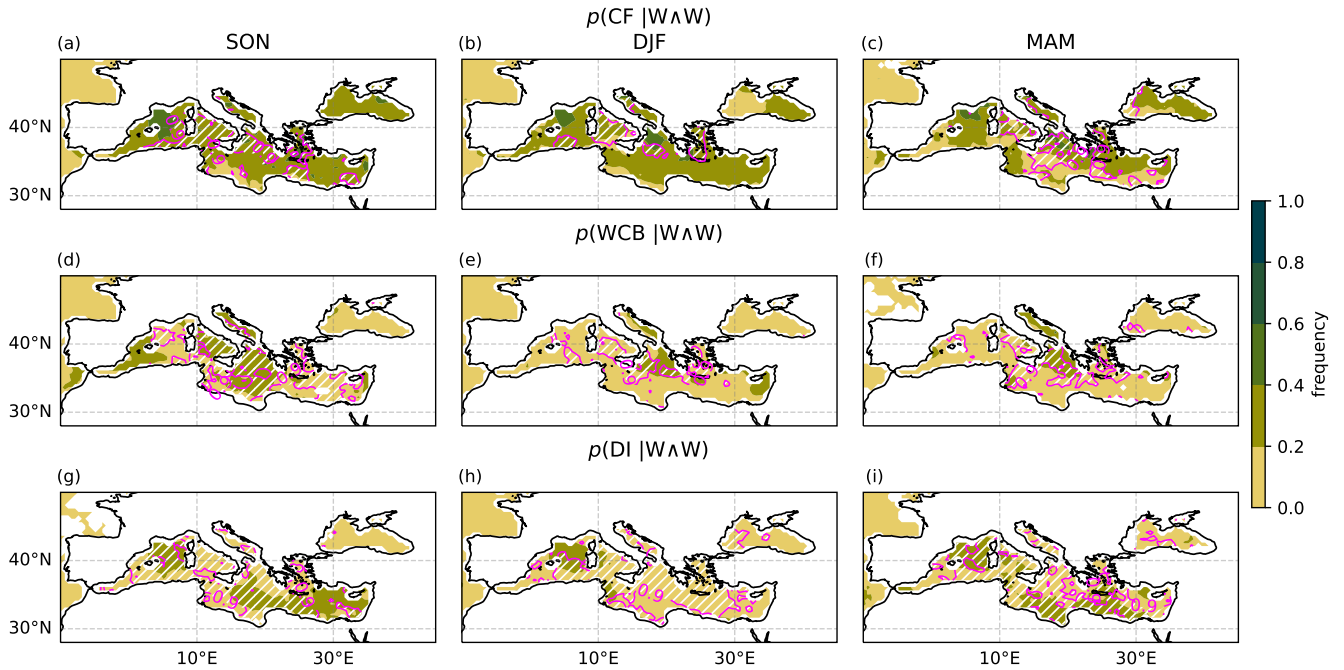

**Figure SM8.** Frequency of (a-c) CFs, (d-f) WCBs and (g-i) DIs conditional to  $W \wedge W$  compound occurrence. Magenta contours and slanted white hatching identify regions where more than 90% of the selected dynamical features are associated with cyclones, according to the definitions of cyclone impact area in Section 3 of the main manuscript
