# Supplementary material for: Linking compound weather extremes to Mediterranean cyclones, fronts and air-streams
Source: Copernicus journal article supplement (doi:10.5194/egusphere-2024-270), 2024-02-08
Supplement: Supplementary file [file egusphere-2024-270-AC2-supplement.pdf]

We thank Reviewer #2 for his useful and detailed comments on the manuscript. We will include his suggestions in the main manuscript as described in the line-by-line answer below. Note that the reviewer's comments are in **black text**, our answers in **red text**.

## REVIEWER 2

The authors examine the role of Mediterranean cyclones in the formation of compound extremes from different perspectives including the distance from the event, the dynamic features, and the type of the cyclone.

The paper is beautifully written with a comprehensive discussion of the results that is extensively supported by the literature. I consider that it should be accepted for publication, but there are some points that needs to be corrected or clarified.

### Specific comments :

- Section 2.1a: Please justify why a coarser temporal and spatial resolution were chosen instead of the available ones from ERA5? The higher resolution wouldn't provide an added-value in the analysis performed?

A few reasons, of conceptual and practical origin, underlie our choice of resolution.

(i) Because we study the statistical relations between Mediterranean cyclones and extremes, the sample of extremes of interest is one where the spatial extent of the events is captured by both the low (0.5 deg) and by the high (0.25 deg) resolution dataset. In fact, we expect extreme impacts by synoptic weather systems to have a spatial extent greater than 0.5 deg, and to be well identified independently of the specific .5 / .25 deg resolution. See e.g. the example in Figure 1.

(ii) A higher resolution dataset could be certainly useful for analysing (a) the characteristics of individual extreme events, in order to detail the interactions between atmospheric flow and topography, or (b) extremes of convective nature. However, (a) we expect climatological statistics to average out any small spatial details of the first kind, and (b), because ERA5 (even at 0.25 deg) does not resolve small-scale convective processes and topographic features, we do not focus on this type of extremes. We point out that, even using a lower 0.5 deg resolution, the climatological role of large-scale topographic features emerges naturally in our results with a sufficient pattern definition for the objective region at study (e.g., see Figure 6, 4a-c).

(iii) Limitations in ERA5 data storage capacity.

We nonetheless acknowledge the reviewer's concern by mentioning the scale of the extreme events sampled by the dataset's resolution in the Methods (Section 2.1), where we specify:

« A horizontal resolution of 0.5 deg suffices for the identification of surface extremes with scales from the order of 100~km, as those induced by synoptic-scale weather systems, but is unable to capture small-scale (convective-driven) extremes. »

- Section 2.1b: As also stated by the authors, negative wave biases are known especially for coastal areas. Why didn't the authors consider using a much higher resolution dataset for the waves available by Copernicus? I'm afraid that this

underestimation could largely affect the frequencies of the wave-wind compounds given that a threshold for wave (i.e., 2m) is set.

In the figure below we compare the 0.5 deg interpolation of wave-and-swell-height with the 0.25 deg dataset for the 11th of November at 12 CET (the same date and time as Figure 1). The cyclone centre is represented by the dark-red dot close to the Balearic Islands. From this case we observe some small changes in the field, but the intensity, location and extent of the wave-height maxima are consistent between the two maps. Hence, we expect small resolution-related changes in extreme wave events to be smoothed out from considering a large sample of cases.

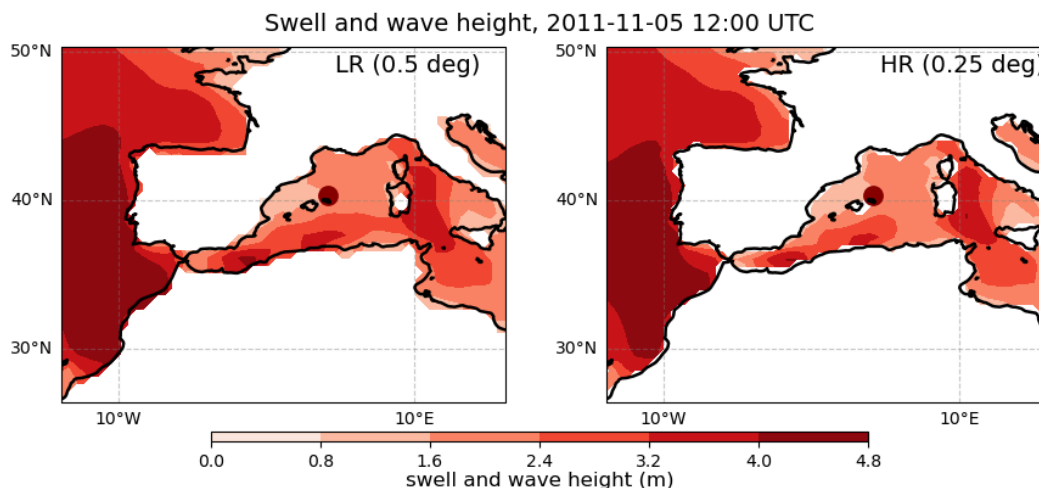

Regarding the swell-and-wave-height systematic bias we point out that, although the data is affected by an underestimation of wave height, the bias is present independently of the presence / absence of a cyclone, hence is unlikely to affect our statistics based on event frequency - and quite independent of the absolute values. This is to say that the number and selection (i.e. the ordering) of the 2% most extreme events should be unaffected compared with an unbiased (or bias-corrected) dataset.

The 2 m minimum threshold for the selection of the extremes is data dependent, meaning that it is sensitive to the absolute values of the extremes in the specific dataset. The specific value was chosen in order to obtain a sample of wave extremes of consistent intensity across the Mediterranean region, i.e. by limiting the selection of extremes in regions where the 98th percentile of the distribution was substantially weaker than elsewhere.

Finally, the choice of resolution still complies with the reasoning detailed in the previous answer.

- Section 2.4 and in the rest of the text:  $p(e)$  is not absolute frequency, it's relative. The text has been corrected throughout.
- Unfortunately, almost all figures are difficult to read. I would suggest trying different colour palettes and patterns and/or increase the size.

To solve this issue, in the new Figures we will increase the size of the panels. We hope this improves the graphical visualisation and we encourage the reviewer to point out specific colour schemes that they find difficult to read.

- I would suggest a proof reading of the text, as there are some errors regarding syntax and, mainly, punctuation.

We will address the reviewer's concern during elaboration of the new version of the manuscript.

#### Minor comments:

- Abstract, line 11: What are these peaks? Spatial? Please clarify.  
Spatial peaks, specification inserted in text.
- Abstract, line 11: The "proportion of cyclone-related compounds" over what?  
We have rephrased to « The fraction of compounds happening within a cyclone's impact area... ». We hope it is clear now that we refer to the fraction of cyclone-related compounds over all compounds.

- Abstract in general: I think the abstract does not capture well the content of the paper.

Although the comment is rather vague, we have tried to edit the abstract in order to better adapt it to the content and findings of the paper, as follows.

« Mediterranean cyclones are the primary driver of many types of surface weather extremes in the Mediterranean region, the association with extreme rainfall being the most established. The large-scale characteristics of a Mediterranean cyclone, the properties of the associated airflows and temperature fronts, the interaction with the Mediterranean Sea and with the topography around the basin, and the season of occurrence, all contribute in determining its surface impacts. Here, we take these factors into account to interpret the statistical links between Mediterranean cyclones and compound extremes of two types, namely co-occurring rain--wind and wave--wind extremes. Compound extremes are attributed to a cyclone if they fall within a specially defined *Mediterranean cyclone impact area*. Our results show that the majority of Mediterranean rain--wind and wave--wind extremes occur in the neighbourhood of a Mediterranean cyclone, with local peaks exceeding 80%. The fraction of compounds happening within a cyclone's impact area is highest when considering transition seasons, and for rain--wind events compared with wave--wind events. Winter cyclones, matching with the peak occurrence of large and distinctively baroclinic cyclones, are associated with the highest compound frequency. A novelty of this work, the de-construction of cyclones' impact areas based on the presence of objectively-identified air streams and fronts, reveals a high incidence of both types of compound extremes below warm conveyor belt ascent regions, and of wave--wind extremes below regions of dry intrusion outflow. »

- Line 53: What do you mean with "objective regions"?  
We have replaced this formulation by « at a global scale ».
- Section 2.2.1: Consider adding a table that could be used as a reference for section 4.3, containing the number of the cluster, the season in which appears and the associated weather configuration (and maybe the region of max occurrence).  
We are thankful for the suggestion and will add such a table in the new manuscript.

- Line 152: Could you elaborate on how the “unit valued grid points” are defined?  
Unit-valued grid points are defined based on the fulfilment of the individual feature conditions listed in the lines preceding 152. Extra clarifications on how the boolean feature masks are defined will be provided within the paragraph in the new version of the manuscript.
- Line 222: Which these factors are?  
These factors are mainly geographical exposure and seasonal changes in the local climatological weather conditions. We have expanded the text to include this.
- Lines 234-236: Could you elaborate on why this happens?

Following the reviewer’s suggestion, we have detached a new paragraph to elaborate more on the peculiarities in the statistics of the south-eastern Mediterranean region. The paragraph reads as below.

« The occurrence of winter R $\wedge$ W events outside cyclones’ impact areas is particularly high in the eastern and southern sectors of the Mediterranean (Fig. 4(h)). Although the fraction of compound events associated with cold fronts and warm conveyor belts peaks in the central Mediterranean (Fig. 5), during the south-eastern Mediterranean winter we detect a larger fraction of stray features amongst those co-occurring with R $\wedge$ W compounds than elsewhere (Fig. 5(b),(e), where hatched areas indicate that more than 90% of the features occurring with compounds are attached to a cyclone). The relatively low local extremal thresholds (Fig. SM1), implying a selection of weather extremes of weak-to-moderate intensity, may be at the origin of the low fractions of cyclone-related compounds and of the higher relevance of stray dynamical features in the region. »

#### Very minor comments :

- Lines 18 & 21: 5 November or November 5<sup>th</sup> or the 5<sup>th</sup> of November  
Modified according to the reviewer’s advice.
- Line 22: I don’t think Wikipedia is an appropriate citation. Please consider other sources.  
We have replaced the Wikipedia link with two online articles from DWD monthly weather report and from The Washington Post.
- Lines 52-55: Please check syntax  
We have changed the lines as follows.  
« Compounding of rain–wind and wave–wind extremes and its relation to extratropical cyclones has received attention at a global scale (Owen et al., 2021; Ridder et al., 2020; Catto and Dowdy, 2021). Although studies on Mediterranean rain–wind extremes exist, these consider a small sample of large-scale events (Raveh-Rubin and Wernli, 2015) or take a Lagrangian cyclone-centred perspective (Rousseau-Rizzi et al., 2023). »
- Line 157: n is not defined; I suppose is the number of events. And N equals ~7200?  
We confirm that n is the number of events, and we have inserted the definition in the text.
- Lines 175-177: Check syntax

- To improve readability, we have rephrased the whole paragraph as follows.  
« Mediterranean cyclones are on average weaker, smaller and shorter-lived than their North-Atlantic equivalents (Trigo et al., 1999; Trigo, 2006; Čampa and Wernli, 2012; Campins et al., 2011). However, a Mediterranean cyclone’s impact area must account for the interactions of the induced atmospheric flow with coastal boundaries and orographic features, since these modify the spatial distribution of the surface impacts (Pfahl, 2014; Houze Jr, 2012; Obermann-Hellhund, 2022; Owen et al., 2021; Flaounas et al., 2019) compared with a conceptual airflow model of an extratropical cyclone over the ocean (Carlson, 1980; Wernli and Davies, 1997; Schultz, 2001). The position of a cyclone centre relative to the coast and to the Mediterranean sea, the main source of moisture, also determines the character of the impacts (Jansa et al., 2001; Pfahl, 2014). »
- Line 179: Which year?  
Year 1980. We thank the reviewer for noting this and have completed the sentence.
- Caption Figure 2: I don’t see “negative dashed” red contours. Is this correct?  
We have corrected the adjectivation, now « negative » refers to the difference.
- Line 211: “most” instead of “must”  
Mistake corrected.
- Line 220: “towards the south west” in which season?  
In spring. We are grateful to the reviewer for signalling our oversight.
- Line 314: “Lions” instead of “Lion”  
We looked this up and both spellings seem to be correct in English.
- Lines 471-472: This paper is published.  
Reference corrected.
- Lines 494-495: This paper is published (2024)  
Reference corrected.
- Line 518: Journal and pages are missing  
This is a book. We have added the total number of pages.
- Line 559-560: This is a pre-print now  
Reference corrected.
- Line 567: Journal and pages are missing  
Reference corrected.
